# Supplementary material for: Bifunctional liposomes reduce the chemotherapy resistance of doxorubicin induced by reactive oxygen species
Source: Royal Society of Chemistry journal article supplement (doi:10.1039/c9bm00590k), 2019-01-01
Supplement: c9bm00590k1.pdf [file c9bm00590k1.pdf]

Bifunctional liposome reduces chemotherapy resistance of doxorubicin  
induced by Reactive Oxygen Species

Lei Xu<sup>1,2</sup>, Zhicheng Zhang<sup>2</sup>, Yawen Ding<sup>2</sup>, Li Wang<sup>2</sup>, Yali Cheng<sup>2</sup>, Lingtong Meng<sup>2</sup>, Jinhui Wu<sup>2</sup>,  
Ahu Yuan<sup>2</sup>, Yiqiao Hu<sup>2,\*</sup>, Yishen Zhu<sup>1,\*</sup>

**Affiliations:**

1 College of Biotechnology and Pharmaceutical Engineering, Nanjing Tech University,  
Nanjing 211816, China;

2 State Key Laboratory of Pharmaceutical Biotechnology, Medical School and School of  
life science, Nanjing University, Nanjing 210093, China.

**\*Author for correspondence:**

Yiqiao Hu, Ph.D. Professor

Address: 22 Hankou Road, Nanjing 210093, China

Phone: +86-25-83596143;

E-mail: huyiqiao@nju.edu.cn

Yishen Zhu, Ph.D. Associate Professor

Address: 30 Puzhu South Road, Nanjing 211816, China

Phone: +86-18900660563;

E-mail: zhuyish@njtech.edu.cn

## Supporting Information

Table.S1 Feed Ratio and Obtained Ratio of DOX: ACF in DOX-ACF@Lipo

| Feed Ratio<br>(ACF: DOX) | DOX<br>( $\mu\text{g/mL}$ ) | ACF<br>( $\mu\text{g/mL}$ ) | Obtained ratio<br>(ACF: DOX) | Diameter<br>(nm) |
|--------------------------|-----------------------------|-----------------------------|------------------------------|------------------|
| 2.1:1                    | 478.9                       | 1018.8                      | 2.13:1                       | 136.46           |
| 2.33:1                   | 543.6                       | 1156.7                      | 2.12:1                       | 148.21           |
| 2.5:1                    | 565.4                       | 1203.3                      | 2.12:1                       | 152.73           |
| 3:1                      | 527.6                       | 1012.9                      | 1.92:1                       | 161.36           |

|              | Diameter(nm) | PDI   |
|--------------|--------------|-------|
| DOX@Lipo     | 136.71       | 0.100 |
| ACF@Lipo     | 139.19       | 0.094 |
| DOX-ACF@Lipo | 141.72       | 0.103 |

Fig.S1 Polydispersity index of DOX@Lipo, ACF@Lipo and DOX-ACF@Lipo

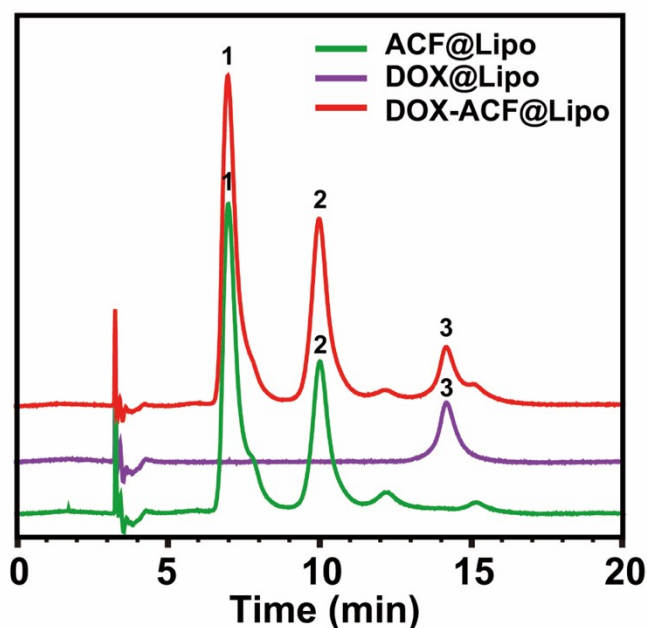

Fig.S2 High Performance Liquid Chromatography (HPLC) data of DOX-ACF@Lipo (Red), DOX@Lipo (purple) and ACF@Lipo (green). The peak 1 and peak 2 belong to two components of ACF (3,6-Diamino-10-methylacridinium and 3,6-Diaminoacridine) and the peak 3 belongs to DOX.

| DOX Concentration (µg/mL) | Peak area at 480nm | ACF Concentration (µg/mL) | Peak area at 468nm |
|---------------------------|--------------------|---------------------------|--------------------|
| 0                         | 0                  | 0                         | 0                  |
| 1                         | 2175               | 1                         | 22891              |
| 10                        | 92036              | 10                        | 494992             |
| 20                        | 225927             | 20                        | 1089958            |
| 50                        | 589928             | 50                        | 2729218            |
| 80                        | 1009350            | 80                        | 4369534            |
| 100                       | 1294387            | 100                       | 5394433            |

Fig.S3 The standard curve value of DOX and ACF.

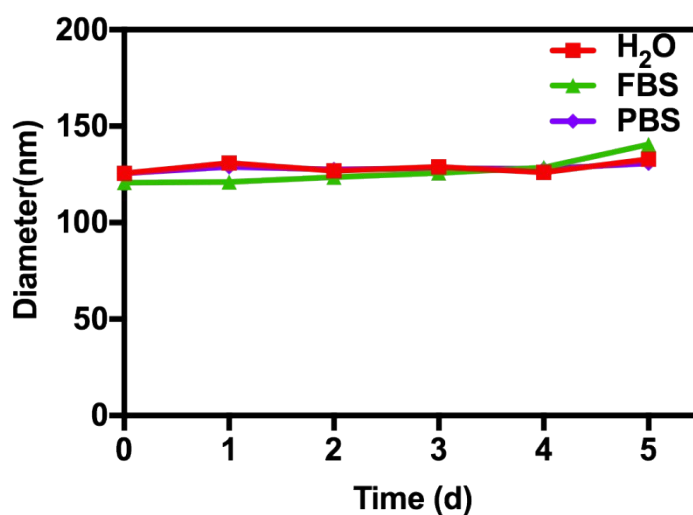

Fig.S4 Size distribution of DOX-ACF@Lipo after 5 days of storage at 4 °C

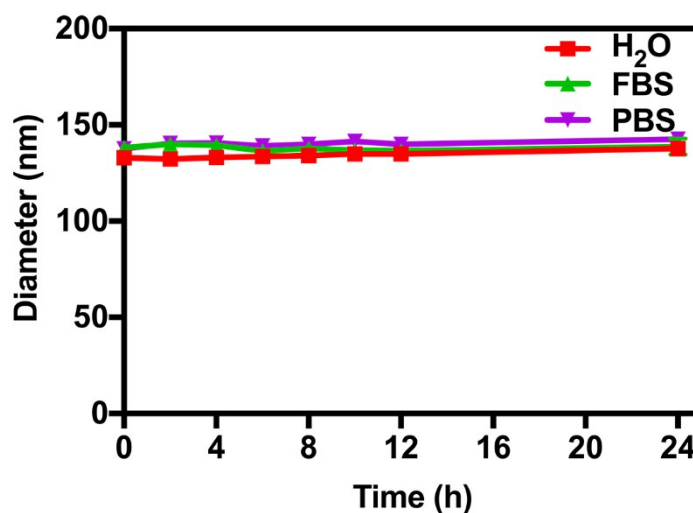

Fig.S5 Size distribution of DOX-ACF@Lipo after 24 h of storage at room

temperature.

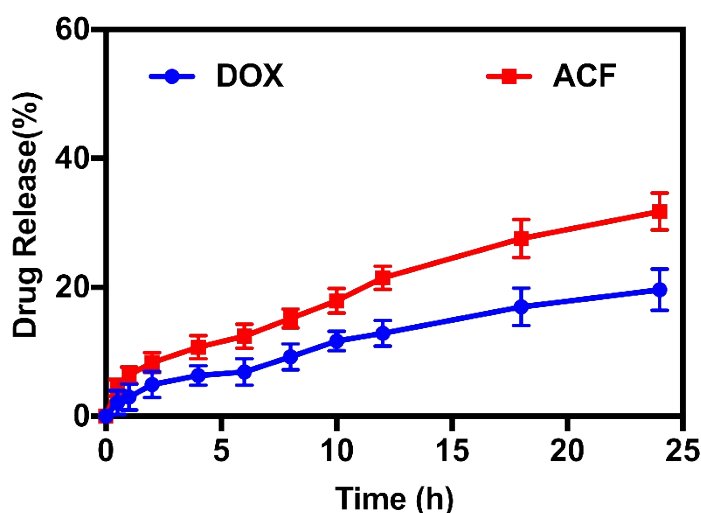

Fig.S6 Drug release curves of DOX-ACF@Lipo.

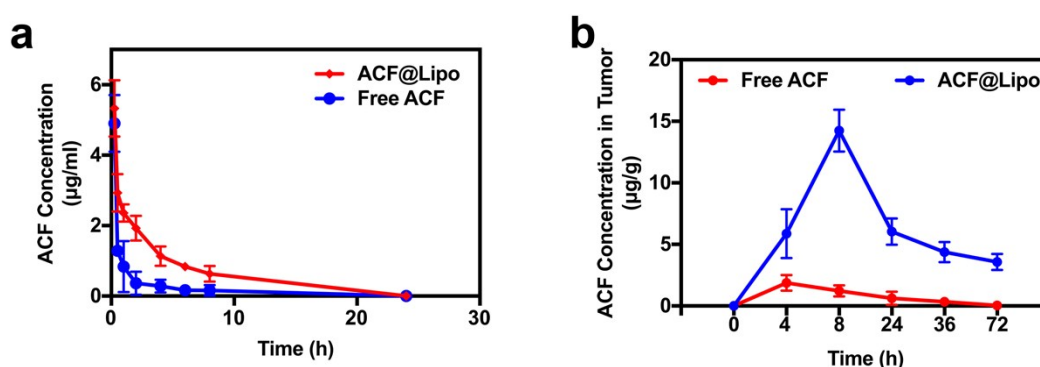

Fig.S7 Accumulation and the pharmacokinetic behavior of ACF. (a) Pharmacokinetic curves of acriflavine in vivo ([acriflavine] = 3 mg/kg). Blood samples were collected and analyzed with HPLC at different time points (0.25, 0.5, 1, 2, 4, 8, 24 h). (b) The dynamic concentrations of acriflavine accumulated in the tumor tissues after intravenous injection of free acriflavine or ACF@Lipo ([acriflavine] = 3 mg/kg). Data are shown as mean  $\pm$  SD (n = 3).

Table.S2 Pharmacokinetic parameters.

|          | $AUC_{0-t}$<br>(mg/L*h) | $AUMC_{0-t}$<br>(h*h*mg/ml) | $MRT_{0-t}$<br>(h) | $t_{1/2}$<br>(h) | $C_{max}$<br>(mg/L) |
|----------|-------------------------|-----------------------------|--------------------|------------------|---------------------|
| Free ACF | 4.98 $\pm$ 0.23         | 7.78 $\pm$ 2.05             | 1.55 $\pm$ 0.35    | 3.01 $\pm$ 2.58  | 4.91 $\pm$ 0.81     |
| ACF@Lipo | 12.41 $\pm$ 1.17        | 32.58 $\pm$ 2.25            | 2.63 $\pm$ 0.07    | 3.70 $\pm$ 0.42  | 5.33 $\pm$ 0.80     |

\* Data was shown as mean  $\pm$ SD (n=3). The pharmacokinetic parameters of acriflavine were analyzed by DAS 3.2 software.

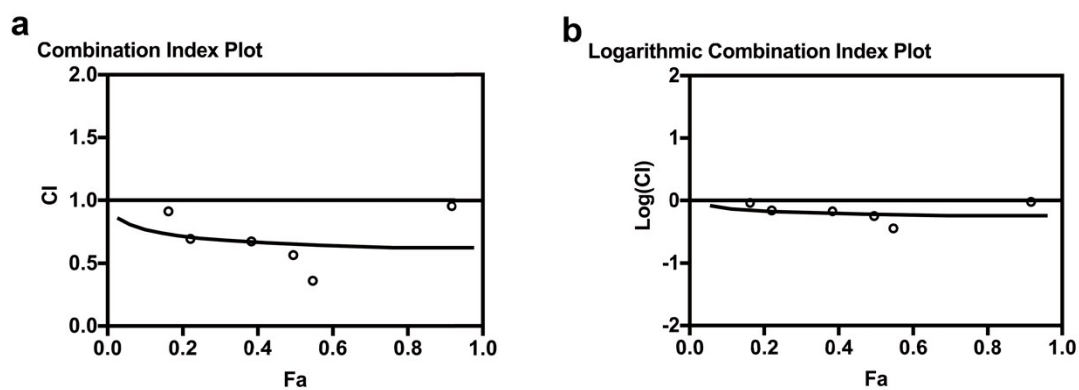

Fig.S8 The combination index (CI) of DOX-ACF@Lipo. (a)Combination Index Plot. (b) Logarithmic Combination Index Plot.

Table.S3 CI values for actual experimental points\*.

| Total Dose | Fa    | CI Value |
|------------|-------|----------|
| 0.147      | 0.917 | 0.95394  |
| 0.735      | 0.547 | 0.35934  |
| 1.47       | 0.495 | 0.56614  |
| 2.94       | 0.383 | 0.67359  |
| 7.35       | 0.22  | 0.69430  |
| 14.7       | 0.162 | 0.91293  |

\* The CI values for actual experimental points were analyzed by the CompuSyn v1.0 software.

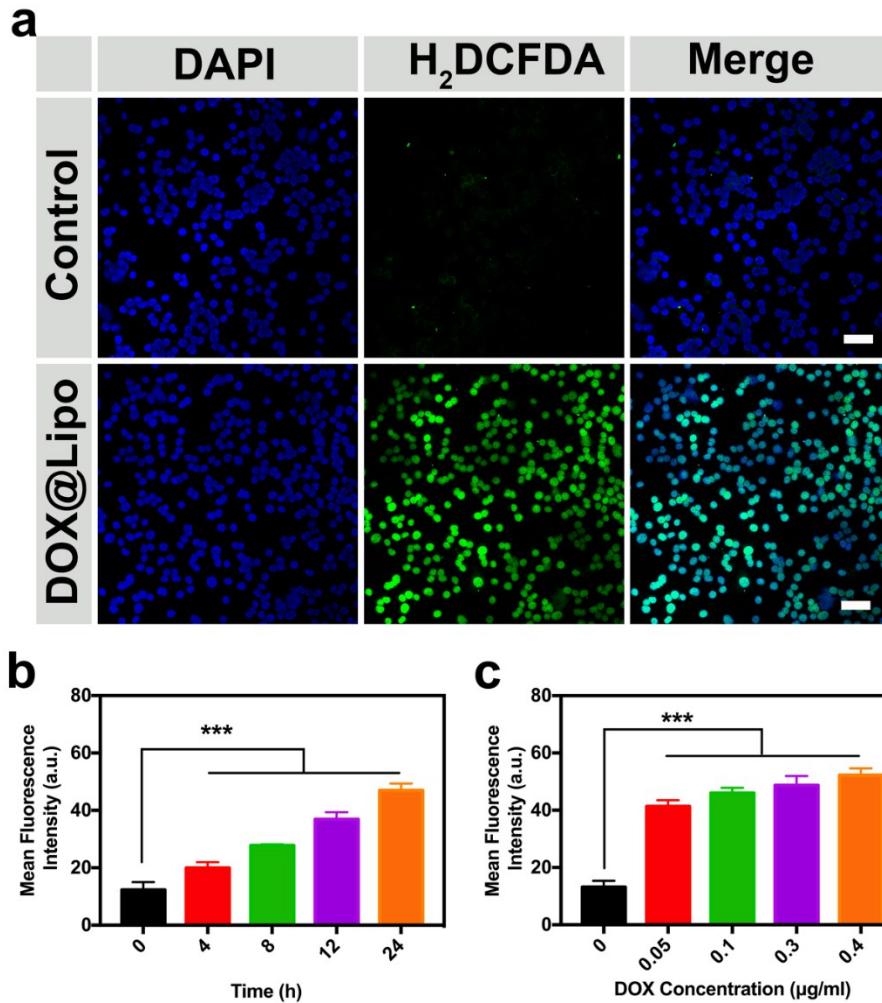

Fig. S9 Generation of hydrogen peroxide in vitro. (a) Images of CT26 cells stained with H<sub>2</sub>DCFDA and DAPI after indicated treatments, scale bar= 50 µm. (b) The ROS content of CT26 cells analyzed with flow cytometer after different treatments with the indicated time. (c) Dynamic changes of ROS content as a function of DOX concentrations. Data are shown as mean ± SD; \*p < 0.05; \*\*p < 0.01; \*\*\*p < 0.001.
